# Supplementary material
Source: Springer Nature journal article supplement (https://www.springermedizin.de/resource/supplementary/12889_2012_4212_MOESM5_ESM.pdf/9491652)
Supplement: MOESM5 [file 9491652]

## Sociodemographic characteristics and medical history

### Sociodemographic characteristics

- Age class (a) : <15 years, 15-50 years or >50 years
- Sex = Male
- Number of subjects in the household
- Number of children in the household
- Socio-professional category of the head of the family (a) :
  - Farmer, primary sector
  - Artisan, shopkeeper, chief executive officer
  - Executive, intellectual profession
  - Middle class
  - Employee
  - Working class
  - Retired
  - Other
- Professional occupation
  - Work in confined space
  - Work outdoors

- Work with children
- Work with sick persons

### Medical history and habits

- History of chronic disease
  - Immune disorder
  - Diabetes mellitus
  - Chronic obstructive pulmonary disease
  - History of asthma
  - Current asthma
  - High blood pressure
  - HIV infection
  - Hepatic disease
  - Renal disease
  - Respiratory disease
  - Systemic disease
  - Multiple sclerosis
  - Other neurological or muscular disease

- Heart failure
- Cardiac arrhythmia
- Coronary heart disease
- History of cancer/hematological malignancy
- Beta-thalassemia minor

- Pregnancy
- Current or former smoker
- Current smoker
- History of ILI for seasons 2006-2007 to 2009-2010

### Medical history and habits in other subjects of the household

- Current or former smokers
- Current smokers
- Histories of ILI for seasons 2006-2007 to 2009-2010

## Characteristics of the housing

### General characteristics

- Type of dwelling (house/apartment)
- Dwelling's area
- Dwelling area per inhabitant
- Number of rooms
- Number of bathrooms
- Number of toilets
- Thermoregulator
- Number of trash cans
- Covers on trash cans
- Frequency of waste collections
- Garden's area

### Kitchen:

- Type of heating
- Type of flooring
- Area
- Dishwasher
- Hood

### Living room:

- Type of heating
- Type of flooring
- Area
- Temperature
- Air humidifier
- Hood

### Bedroom:

- Type of heating
- Type of flooring
- Area
- Windows orientation
- Temperature
- Air humidifier
- Insulated glazing

### Presence of animals:

- Dog(s)
- Cat(s)
- Rodent(s)
- Bird(s) Pandemic vaccination

## Geographic area

### Surrounding activity

- Farm:
  - Pig farm
  - Poultry farm
- Factory
- Fields

### Demography

- Size of urban area (inhabitants)
- Proportion of Inhabitants by age class
- Proportion of socio-professional groups
- Rate of unemployment

- Proportion of people using public transport to go to work
- Proportion of households composed of:
  - Families with children
  - Families with  $\geq 2$  children
  - Persons living alone
- Types of dwellings
- Proportion of dwellings owned by inhabitants
- Proportion of social housing
- Surface of dwellings
- Proportion of migrants
- Mean annual income

**Collected at entry**

## Attitudes, beliefs and risk perception

### Attitudes

- In case of epidemic, I would intend to:
  - Wear masks in public
  - Take antivirals such as Tamiflu®
  - Get vaccinated against seasonal flu
  - Often washing your hands
  - Avoid public transports
  - Avoid public gatherings
  - Keep children away from school
  - Stay away from work

I have already taken preventive measures against influenza

### Beliefs

- Some people were infected by influenza A in France
- Some people died from influenza A in France
- Influenza A remains a mystery to me
- I have a very clear idea about this disease
- Mechanisms of the disease are not easily understood
- Influenza A can be transmitted by:

- Spit
- Nasal mucus
- Cough or sneeze
- Contact of hands or cheeks
- Inert objects
- Pork consumption

- Efficient measures to avoid being infected:

- Wearing masks in public
- Antivirals such as Tamiflu®
- Vaccination against seasonal flu
- Hands washing
- Avoiding public transports

- Avoiding public gatherings
- Not sending children to school
- Not going to work
- Limiting traffic in infected areas
- Forbidding street protests
- Closing schools and preschools
- Putting sick people in quarantine
- All infected people have symptoms
- Influenza A is a severe disease
- Influenza A has a severe impact on bodily functions
- Consequences of influenza A are totally unpredictable
- Influenza A is most often fatal
- I feel well informed regarding influenza
- I am confident in authorities to mitigate an epidemic
- I am confident in authorities to inform me about influenza A
- Authorities hide important information about influenza A

### Risk perception

- There's a high probability ( $\geq 50\%$ ) of being infected:
  - If no preventive measure is taken
  - If preventive measures are taken
- Some preventive measures can reduce the infection risk
- Prevention against flu highly depends on behaviors
- There's not much we can do to protect ourselves against influenza A
- We can reduce the infection risk by taking personal measures

## Preventive measures

### Vaccination

- Pandemic vaccination
- Time since pandemic vaccination
- Seasonal vaccination for seasons 2006-2007 to 2008-2009
- Anti-pneumococcal vaccination

### Hygiene measures

- Daily frequency of hands washing (with soap or hand sanitizer)
- Cover coughs/sneezes
- washes hands after coughing/sneezing
- Uses facial tissues (vs. handkerchiefs)

### Vaccination in other subjects of the household

- Pandemic vaccination
- Seasonal vaccination for seasons 2006-2007 to 2008-2009

### Hygiene measures in other subjects of the household

- Daily frequency of hands washing (with soap or hand sanitizer)
- Always cover coughs/sneezes
- Always or often wash hands after coughing/sneezing

## Duration of meetings

### By location:

- Professional occupation
- At home
- At school
- At work
- In transports

### By age of contacts:

- 0-10 years
- 10-20 years
- 20-50 years
- 50-70 years
- >70 years
